1 **The parietal operculum preferentially encodes heat pain and not salience**

2 Björn Horing, Christian Sprenger, Christian Büchel

3

4 Björn Horing, Ph.D. (corresponding author)

5 Affective Neuroscience Group

6 Department of Systems Neuroscience

7 University Medical Center Hamburg-Eppendorf

8 e-mail [b.horing@uke.de](mailto:b.horing@uke.de)

9 phone +49 040 7410 - 57890

10

11 Christian Sprenger, M.D.

12 Affective Neuroscience Group

13 Department of Systems Neuroscience

14 University Medical Center Hamburg-Eppendorf

15

16 Christian Büchel, M.D.

17 Affective Neuroscience Group

18 Department of Systems Neuroscience

19 University Medical Center Hamburg-Eppendorf

20

21

22 **Abstract**

23 Substantial controversy exists as to which part of brain activity is genuinely attributable to pain-  
24 related percepts, and which activity is due to general aspects of sensory stimulation, such as its  
25 salience. The challenge posed by this question rests largely in the fact that pain is per se highly  
26 salient, a characteristic which therefore has to be matched by potential control conditions. Here, we  
27 used a unique combination of functional magnetic resonance imaging, behavioral and autonomic  
28 measures to address this longstanding debate in pain research.

29 Subjects rated perceived intensity in a sequence alternating between heat and sound stimuli.

30 Neuronal activity was monitored using fMRI. Either modality was presented in six different  
31 intensities, three of which lay above the pain threshold (for heat) or the unpleasantness threshold  
32 (for sound). We performed our analysis on 26 volunteers in which psychophysiological responses (as  
33 per skin conductance responses) did not differ between the two stimulus modalities. Having thus  
34 ascertained a comparable amount of stimulus salience, we analyzed pain-related stimulus response  
35 functions, and contrasted them with those of the salience-matched acoustic control condition.

36 Furthermore, analysis of fMRI data was performed on the brain surface to circumvent blurring issues  
37 stemming from the close proximity of several regions of interest located in heavily folded cortical  
38 areas. We focused our analyses on insular and periinsular regions which are strongly involved in  
39 processing of painful stimuli. We employed an axiomatic approach to determine areas showing  
40 higher activation in painful compared to non-painful heat, and at the same time showing a steeper  
41 stimulus response function for painful heat as compared to unpleasant acoustic stimuli. Intriguingly,  
42 an area in the posterior parietal operculum emerged whose response showed a pain preference, and  
43 where we can unequivocally exclude salience as explanation.

44 This result has important implications for the interpretation of functional imaging findings in pain  
45 research, as it clearly demonstrates that there are areas whose pain-related activity is not due to

46 general stimulus characteristics such as salience. Conversely, several areas did not conform to the  
47 formulated axioms to rule out general factors as explanations.

48

## 49 **Introduction**

50 Pain is a multidimensional experience, including sensory-discriminative, affective-motivational,  
51 cognitive-evaluative as well as motor components [1], and is defined as “an unpleasant sensory and  
52 emotional experience associated with actual or potential tissue damage, or described in terms of  
53 such damage” [2]. Following the advent of brain imaging, recurring patterns of brain activity  
54 following painful stimuli were summarized as a “pain matrix”, comprising primary and secondary  
55 somatosensory cortices, cingulate cortices, as well as the insular subregions, among other structures  
56 [3,4].

57 This activity has frequently been attributed to pain per se. However, it has been pointed out that  
58 precisely because pain is a composite sensation, some of the observed activation may or may not be  
59 exclusively pain-related [5,6]. These studies provided evidence that in many cortical regions,  
60 activation is observed for both painful and non-painful (such as tactile or auditory) stimuli. Hence,  
61 general processes such as stimulus salience were put forward as an alternative interpretation. These  
62 contributions have led to lively controversy [7–9]. Recently, the authors positing the initial challenge  
63 to the “pain matrix” concept revisited these issues [10], and reemphasized that great care should be  
64 taken experimentally to match non-painful control modalities, which has frequently been neglected  
65 in previous studies.

66 In addition to the question of stimulus salience, many experiments have relied on the use of single  
67 stimulus intensities to characterize neuronal responses, when using painful stimulation and  
68 compared these responses to a non-painful control condition. However, such approaches disregard  
69 the possibility of modality-specific baseline activation, further compounding the issue to properly  
70 account for nonspecific activation [11]. A possible solution is to employ multiple stimulus intensities,  
71 which allows for the characterization of modality-specific stimulus-response functions [12,13], and a  
72 comparison of these between modalities.

73 Here, we address these issues, and present a novel approach that allows to directly test whether  
74 there are cortical regions that can be defined as salience detectors or show preferential pain  
75 processing. We employed heat and sound as stimulus modalities. Stimuli were presented in  
76 alternating modalities in a within-subjects design. Of each modality, we used six graded intensities –  
77 three below and three above the pain and unpleasantness threshold, respectively. This allowed us to  
78 determine stimulus-response functions of physical intensities or their percepts, and relate those to  
79 neuronal activity [12–14]. Importantly, auditory and thermal intensities were calibrated as  
80 equisalient using an objective autonomic measure (skin conductance responses; SCR) [15].

81 We paid particular attention to insular and periinsular regions, especially the posterior insula and the  
82 parietal operculum (the secondary somatosensory cortex), all of which have been reported as early  
83 components of pain-responsive cortical areas [4,9,16–18].

84 To define areas as preferentially pain-processing, our analyses followed an axiomatic approach which  
85 posits several logical conditions to be met to make a valid inference (see [19], for a similar approach  
86 in pain avoidance). Within this rigorous approach, we formulated the following set of conditions to  
87 preclude the possibility that activity in an area could be explained by salience alone: The effect of  
88 painful stimulation should be larger than that of non-painful heat (axiom 1); the effect of painful  
89 stimulation should be larger than that of (salience-matched) unpleasant sound (axiom 2); the  
90 relationship of ratings and BOLD should be stronger for painful heat than for non-painful heat (axiom  
91 3); the positive relationship of pain ratings and BOLD responses should be stronger for painful heat  
92 than for (salience-matched) unpleasant sound (axiom 4).

93

94

## 95 Results

96 Heat stimuli were presented using a CHEPS thermode, sounds were 1kHz beeps presented binaurally  
97 via headphones. For a brief overview, see Figure 1. Details are provided in the Method section.

98

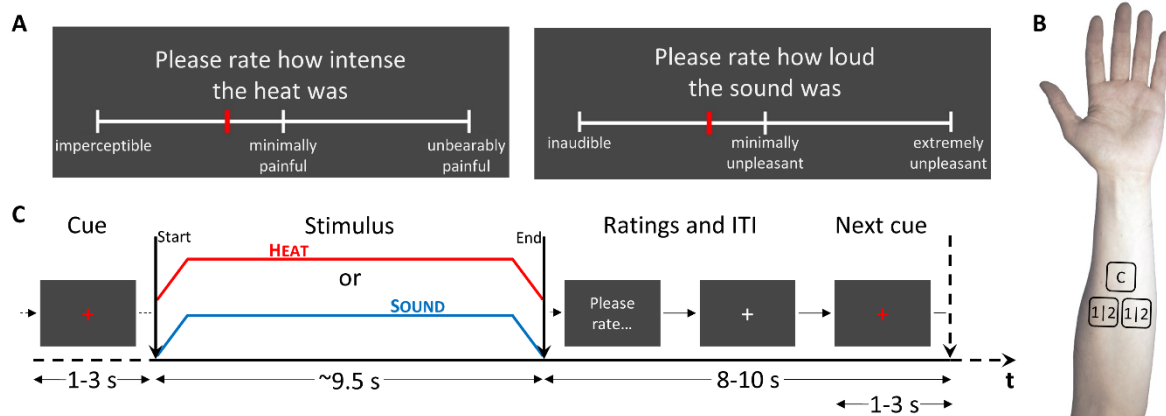

99

100 **Figure 1.** Experimental procedures. **A.** Visual analogue scales (VAS) for rating heat (left) and sound stimuli  
101 (right). The midpoint signifies the pain threshold, corresponding to a score of 0 in a conventional VAS. **B.**  
102 Thermode arrangement on a subject's forearm. Patch C was used for calibration, patches 1|2 were used in  
103 counterbalanced fashion for experimental sessions 1 and 2. **C.** Protocol by time. A visual cue (white fixation  
104 cross turning red) announced the upcoming stimulus (either heat or sound) and stayed visible throughout  
105 stimulation, which was 8 seconds at plateau (roughly 9.5 seconds all in all, depending on calibration). Subjects  
106 were then prompted to rate the stimulus. After rating, the white fixation cross reappeared, to turn red again  
107 for the next cue. Stimulus modalities were always alternating.

108

## 109 Sample

110 A core prerequisite of our analysis strategy was that both modalities (heat and sound) were matched  
111 with respect to salience. Although previous studies based salience estimates on ratings, this can be  
112 problematic when comparing sound and heat stimuli due to differential scaling. We therefore  
113 selected skin conductance responses (SCR) as an objective readout parameter linked to salience  
114 [15,20,21]. Consequently, our approach is based on comparable SCR for sound and heat stimuli. This

115 necessitated the selection of suitable subjects and experimental sessions that fulfilled this criterion  
116 (see Methods). Analysis included N=26 subjects (50% female, mean age $\pm$ SD 25.8 $\pm$ 3.6; see S1 Table  
117 for more detailed sample characteristics).

118

### 119 *Skin conductance results*

120 As intended by stimulus matching, no significant difference between modalities prevailed ( $p=0.177$ )  
121 (random intercept model; Figure 2). SCR increased by intensity ( $t(308)=7.797$ ,  $p=1e-13$ ). There was  
122 no interaction between intensity and modality ( $p=0.514$ ).

123

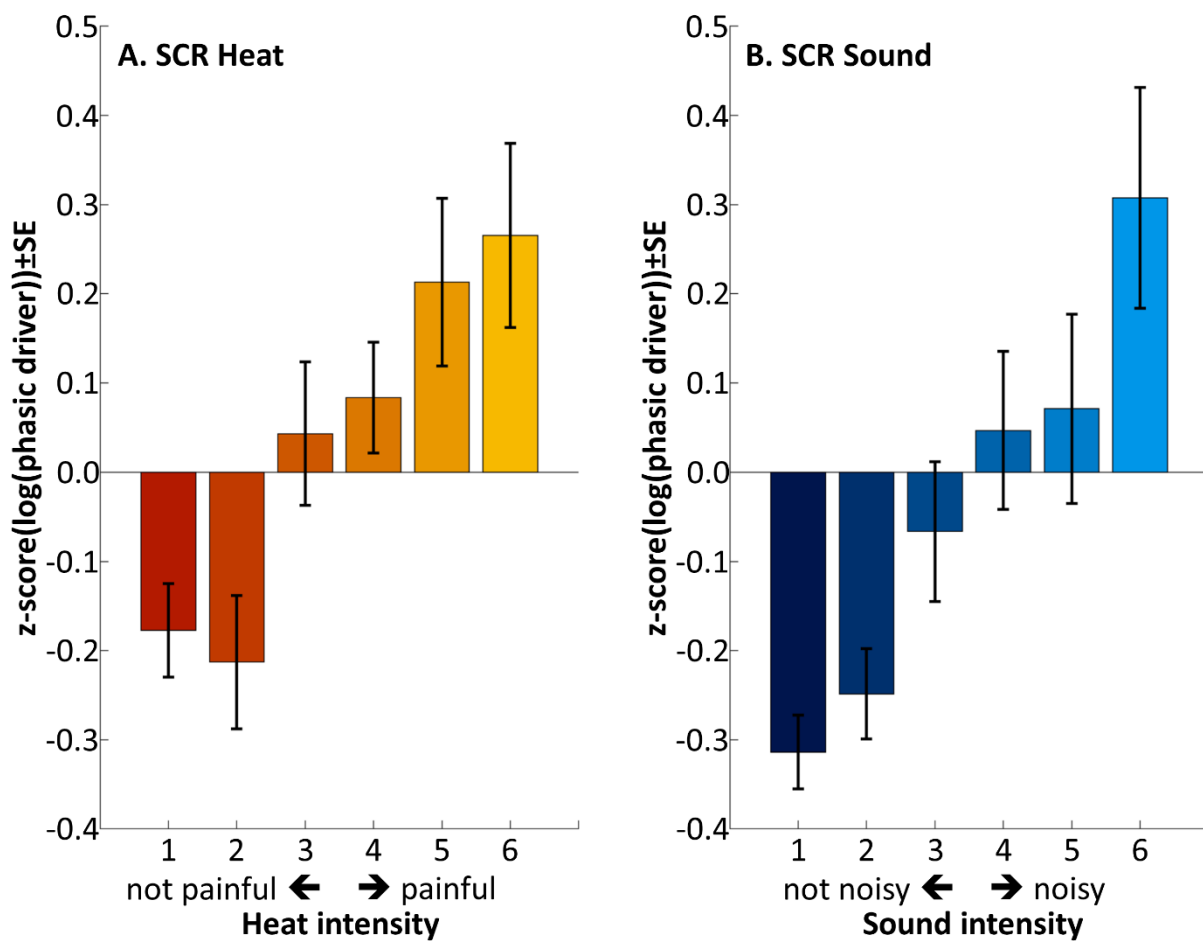

124

125 **Figure 2.** Skin conductance responses following heat (A) and sound stimuli (B). The pain and unpleasantness  
126 thresholds were located between intensities 3 and 4, as per calibration.

127 *Stimulus calibration results*

128 Mean heat pain threshold was at  $43.5 \pm 1.1^\circ\text{C}$  (range 40.5 to 45.4) and corresponded to 50 points on a  
129 0 to 100 point visual analogue scale (VAS). Temperatures for stimulus intensities below and above  
130 pain threshold, corresponding to VAS targets of 25, 35, 45, 55, 65 and 75, were  $41.8 \pm 1.5^\circ\text{C}$ ,  
131  $42.5 \pm 1.3^\circ\text{C}$ ,  $43.2 \pm 1.1^\circ\text{C}$ ,  $43.9 \pm 1.0^\circ\text{C}$ ,  $44.6 \pm 1.0^\circ\text{C}$  and  $45.3 \pm 1.1^\circ\text{C}$ , respectively. Mean unpleasantness  
132 threshold was at  $83.0 \pm 6.7\text{dBA}$  (range 69.0-99.8). For additional details on heat and sound calibration,  
133 see Methods, and S2 Table.

134

135 *Behavioral results*

136 The analysis of subjective ratings of sound and heat stimuli revealed a significant effect of modality  
137 ( $t(320)=7.820$ ,  $p=8\text{e-}14$ ; average sound rated estimate $\pm$ SE  $13.3 \pm 1.7$  VAS points higher than average  
138 heat) (random intercept model; Figure 3) and a main effect of intensity ( $t(320)=42.014$ ,  $p=2\text{e-}16$ ;  
139  $11.8 \pm 0.3$  VAS points per intensity step). The interaction between intensity and modality was also  
140 significant ( $t(320)=-4.1529$ ,  $p=4\text{e-}5$ ;  $2.3 \pm 0.6$  VAS points shallower slope in sound, per intensity step).

141



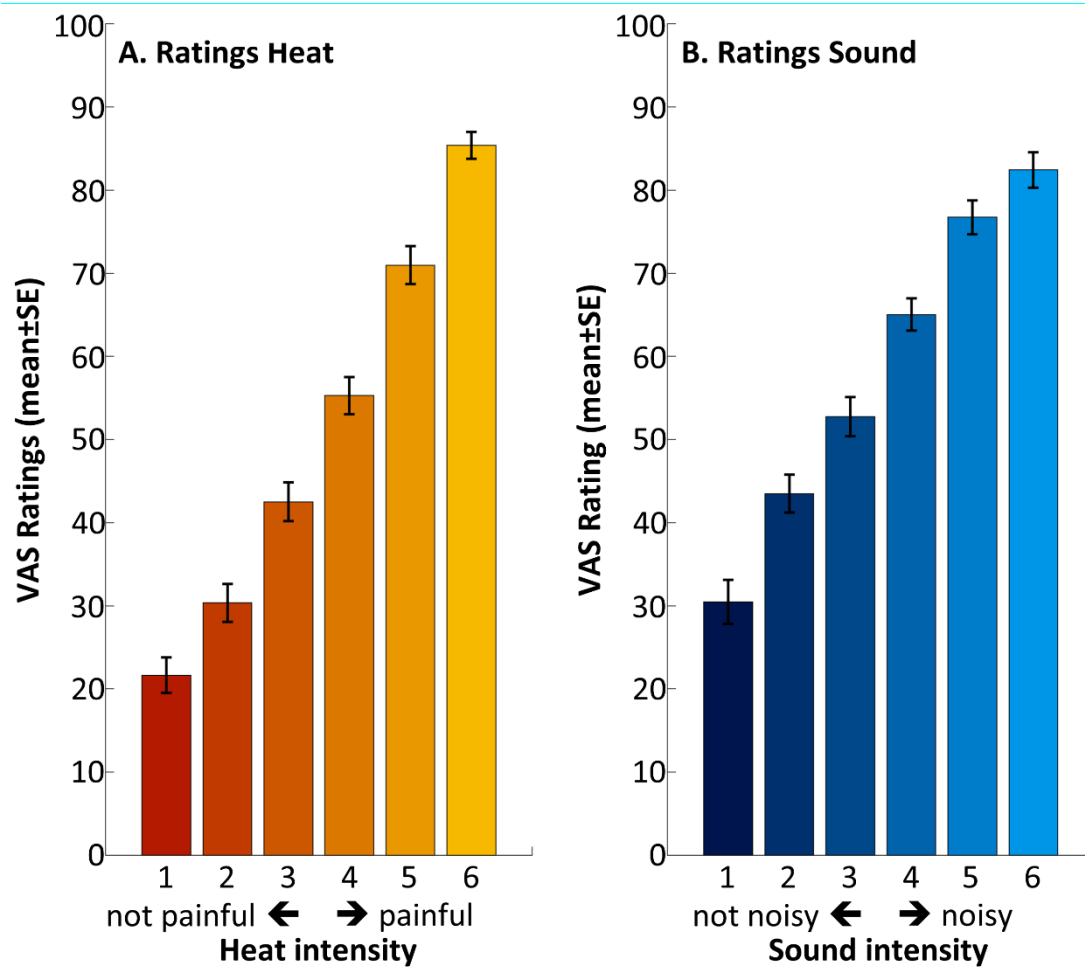

142

143 **Figure 3.** Behavioral ratings following heat (A) and sound stimuli (B). The pain and unpleasantness thresholds  
144 were located between intensities 3 and 4, as per calibration.

145

#### 146 *Imaging results*

147 For either modality, a mask was used that was obtained from main effect activations a) larger than  
148 the respective comparator modality and b) larger than baseline (S1A Figure; see Methods for details).

149 The same mask was applied to all contrasts reported in the following, with the exception of  
150 conjunction analyses, which were performed without mask. Application of the masks constrains the  
151 analyses to areas consistently activated during the respective modality.

152

153

154 **Main effects of modality**

155 To test for intermodal differences, we contrasted the main effects for heat and sound (Figure 4).

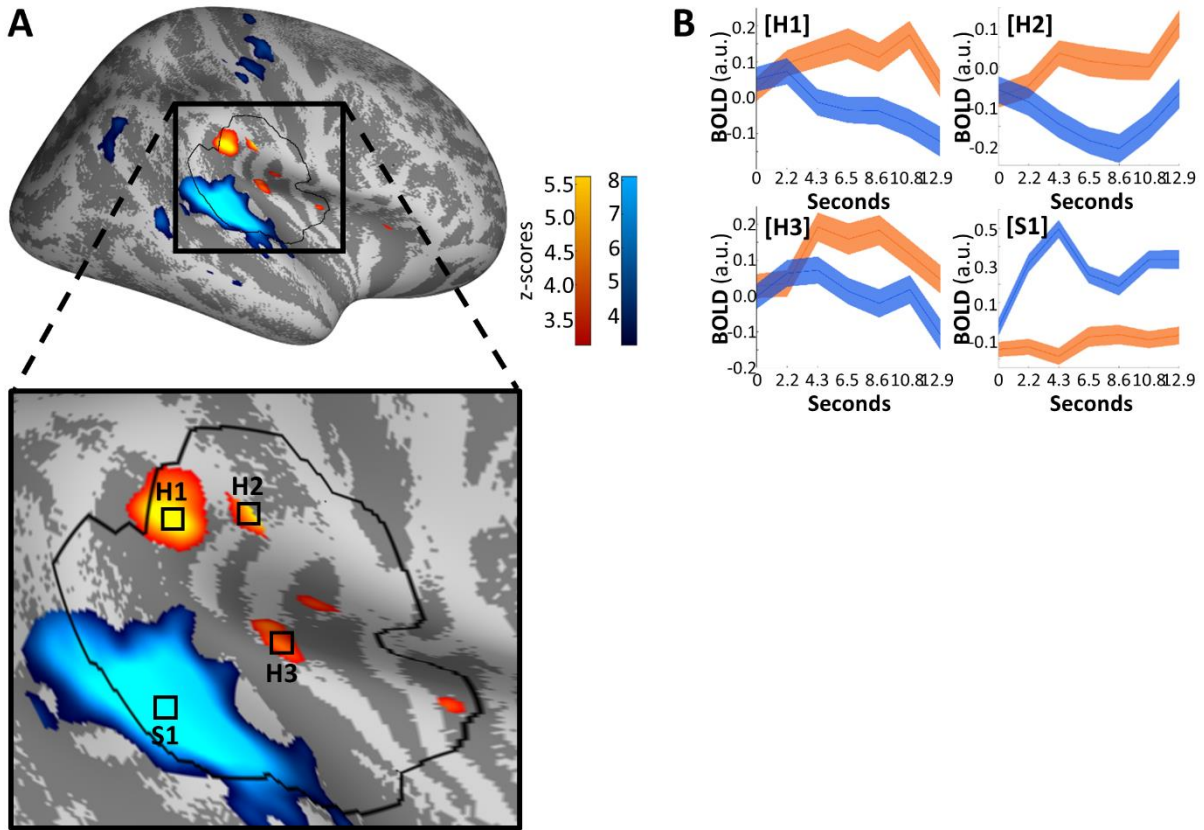

156

157 **Figure 4.** Differential effects of heat (orange) and sound (blue). Significant differences were found in the  
158 parietal operculum (H1, H2) and dorsal posterior insula (H3) for heat; in the superior temporal gyrus (S1) and  
159 Heschl's gyri for sound. **A.** Activations are thresholded at  $p(\text{uncorrected}) < 0.001$  and overlaid on an average  
160 brain surface for display purposes. The black line delineates the region of interest used for correction for  
161 multiple comparisons. See S2 Figure for peak locations in brain volume slices. **B.** Poststimulus plots of fMRI  
162 activation over all stimulus intensities (mean  $\pm$  SE). Subplots H1 through H3 show that heat-related activation  
163 (orange) dominates in the analyzed time frames (seconds 2.2 through 10.8, see Methods), while subplot S1  
164 shows increased sound activation (blue).

165

166 The parietal operculum (secondary somatosensory cortex; peak MNI coordinates  $x=51, y=-30, z=28,$

167  $Z=5.62, p(\text{corrected})=1e-05$ ; second peak at  $x=59, y=-23, z=25, Z=5.221, p(\text{corrected})=1e-04$ ) and

168 dorsal posterior insula ( $x=40, y=-21, z=19, Z=4.175, p(\text{corrected})=0.012$ ) showed stronger activation  
169 for heat as compared to sound. Conversely, Heschl's gyri (primary auditory cortex;  $x=64, y=-24, z=7,$   
170  $Z=\text{Inf}, p(\text{corrected})=4e-16$ ) showed stronger activation for sound stimuli.

171 Of note, areas activated by either modality show no overlap, as determined via conjunction analyses,  
172 even at a liberal threshold of  $p(\text{uncorrected}) < 0.001$ , of contrasts of heat or sound larger than  
173 baseline activation. The conjunction analysis did not use any masking; regardless, it did not yield  
174 significant results.

175

#### 176 **Parametric modulation by stimulus intensity**

177 Irrespective of modality, main effects can be confounded by unspecific effects associated with the  
178 generic occurrence of an external stimulus, such as orientation and response preparation. Therefore,  
179 we performed an analysis investigating stimulus response functions (SRFs), i.e., testing for stronger  
180 BOLD responses for higher stimulus intensities.

181 We contrasted both modalities to identify areas with diverging SRFs within those areas showing a  
182 main effect of either modality, as determined above. For heat, we identified activity in the parietal  
183 operculum ( $x=57, y=-30, z=31, Z=3.999, p(\text{corrected})=0.026$ ) whose SRF diverges from that of the  
184 sound modality (Figure 5A). For sound, no significant activity prevailed, that is, no relationship of  
185 intensity and brain activity was found within the region of interest. Closer inspection of the time-  
186 course of the SRF in the heat modality (Figure 5B) indicates that the SRF's maximum slope coincides  
187 with the peak of the main effect, that is, the modulation of the main effect by intensity is strongest  
188 when the main effect itself is strongest.

189

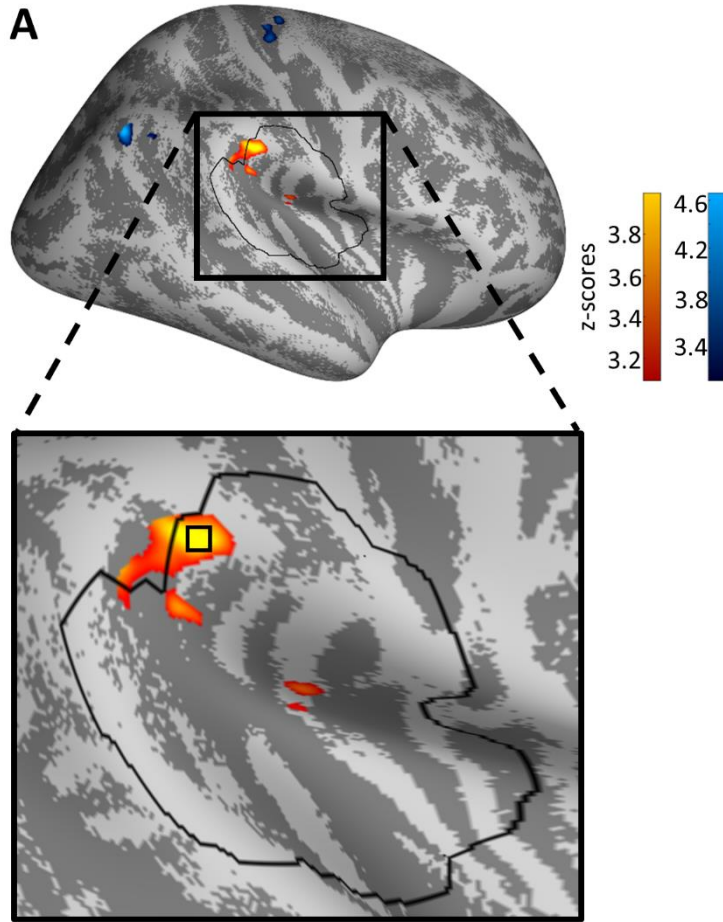

**B Parietal operculum (SII)**

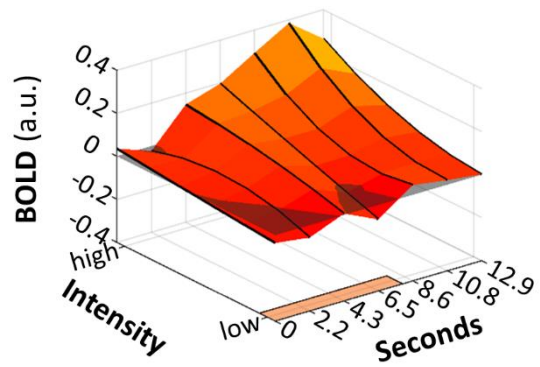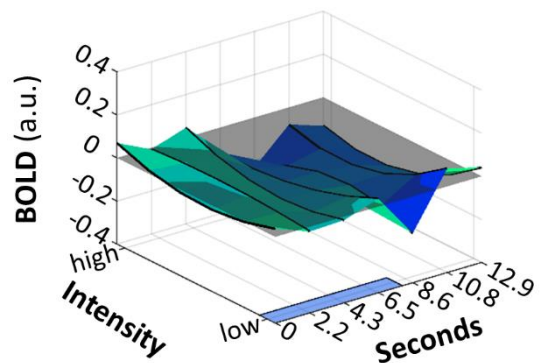

192 **Figure 5.** Differential modulation by stimulus intensity for heat (orange) and sound (blue). Significant  
193 differences were found in the parietal operculum (H1) for heat. **A.** Activations are thresholded at  
194  $p(\text{uncorrected}) < 0.001$  and overlaid on an average brain surface for display purposes. The black line delineates  
195 the region of interest used for correction for multiple comparisons. See S3 Figure for peak positions in brain  
196 volume slices, and S3B for sound activation in S1. **B.** Poststimulus plots of fMRI activation in vertex H1 during  
197 heat (orange) and sound (blue). The colored patches at the right axes show the stimulus duration. The lower  
198 left (y-)axes show the parametric modulation affecting the main effect (average size of the effect along the  
199 lower right (x-)axes): A straight line parallel to the y-axis indicates no change of the BOLD response depending  
200 on stimulus intensity, whereas the a sloped main effect along the y-axis indicates parametric modulation. In  
201 this area, the main effect of heat is mostly positively modulated by stimulus intensity, that is, higher stimulus  
202 intensities induce a higher extent of BOLD. The highest main effect activation occurs around second 10.8  
203 (corresponding to scan 6), coinciding with the steepest slope of parametric modulation by intensity (y-axis).

204

205 Again, an unmasked conjunction analysis at a liberal threshold yielded no significant overlap of both  
206 modalities, when comparing contrasts with an SRF slope larger than zero for either modality.

207

### 208 **Parametric modulation by ratings**

209 Although relevant, physical stimulus intensity might not be directly mapped to neuronal activity, as a  
210 sensory signal undergoes multiple levels of processing before it reaches cortical areas. We therefore  
211 performed an additional analysis, where we investigated whether areas show BOLD responses that  
212 are correlated with subjects' behavioral ratings.

213 This analysis revealed that activity in the parietal operculum ( $x=55, y=-37, z=26, Z=5.091,$   
214  $p(\text{corrected})=2e-04; x=58, y=-14, z=18, Z=4.312, p(\text{corrected})=0.008$ ) and the dorsal anterior insula  
215 ( $x=36, y=0, z=14, Z=4.276, p(\text{corrected})=0.009; x=41, y=1, z=14, Z=3.849, p(\text{corrected})=0.047$ ) (Figure  
216 6) showed a positive relationship to perceived intensity. This agrees with and extends results from  
217 the previous analysis in which BOLD responses were correlated with stimulus intensity in the parietal

218 operculum. For sound, no significant activity prevailed, that is, no relationship of ratings and brain  
219 activity was found.

220

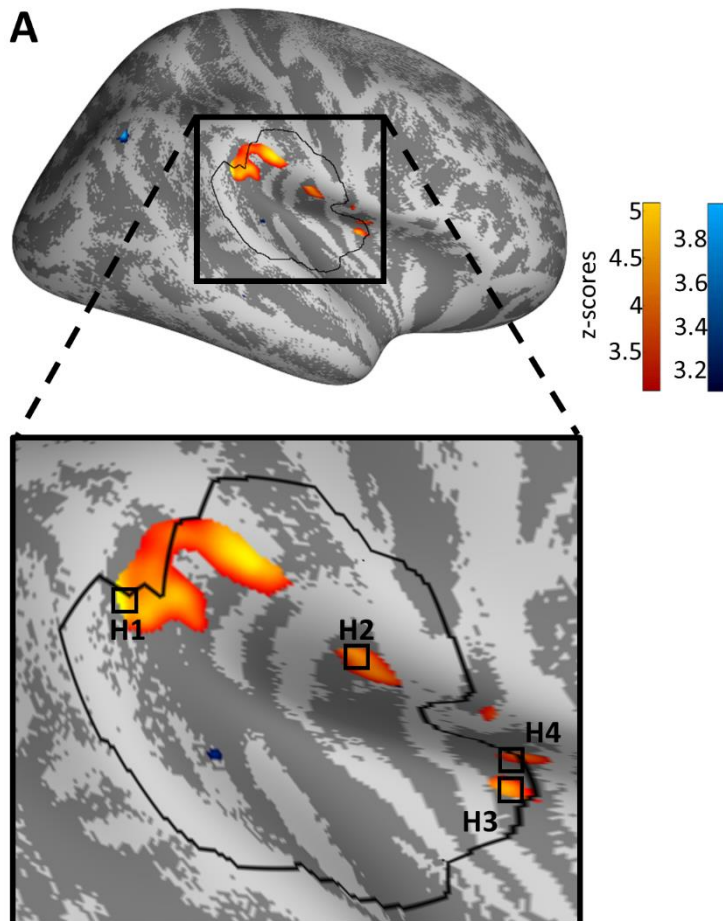

221

222



**B [H1] Parietal operculum (SII)**

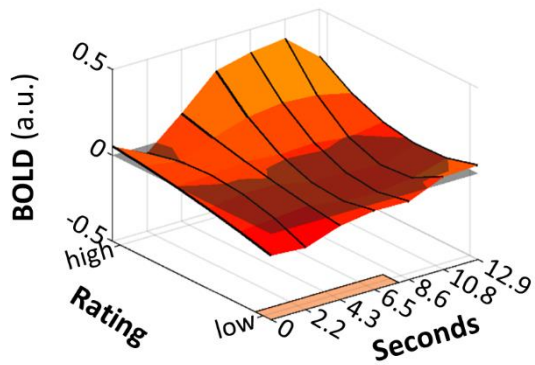

**[H2] Parietal operculum (SII)**

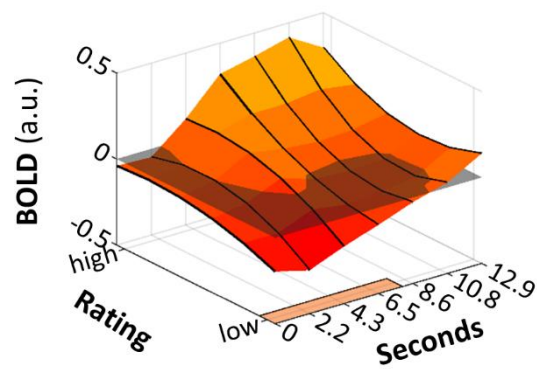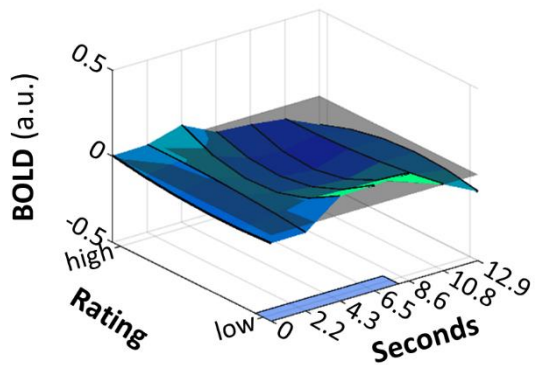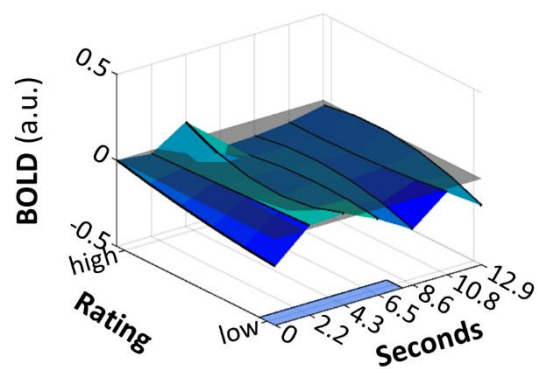

223

**[H3] Dorsal anterior insula**

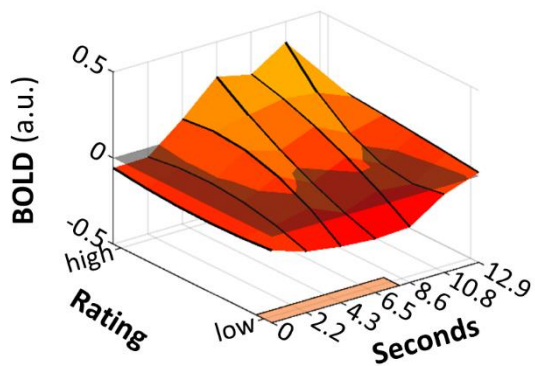

**[H4] Dorsal anterior insula**

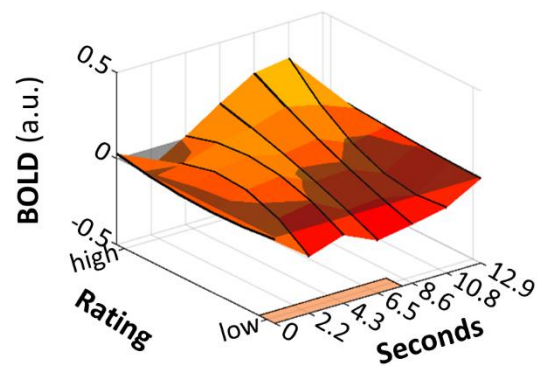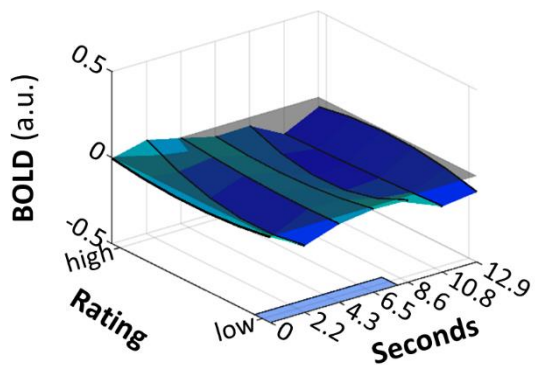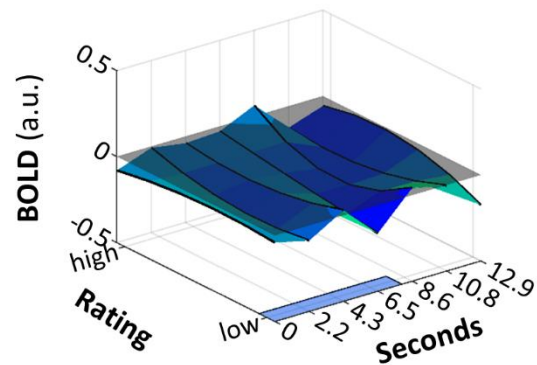

224

225 **Figure 6.** Differential modulation by ratings for heat (orange). Significant differences were found in the parietal  
226 operculum (H1, H2), central operculum (H3) and dorsal anterior insula (H4). **A.** Activations are thresholded at

227  $p(\text{uncorrected}) < 0.001$  and overlaid on an average brain surface for display purposes. The black line delineates  
228 the region of interest used for correction for multiple comparisons. See S4 Figure for peak positions in brain  
229 volume slices. **B.** Poststimulus plots of fMRI activation in vertices H1 through H4 during heat (orange) and  
230 sound (blue). The colored patches at the right axes show the stimulus duration. The lower left (y-)axes show  
231 the parametric modulation by ratings that are affecting the main effect.

232

233 As before, in the unmasked conjunction analysis of contrasts where rating correlated with the BOLD  
234 responses, no regions with significant overlap were found.

235

### 236 **Imaging results distinguishing stimuli perceived below and above thresholds**

237 So far, all analyses pooled over non-painful and painful heat percepts. To further investigate pain-  
238 related responses, we separated those stimuli reported as non-painful from those reported as painful  
239 (i.e., subthreshold versus suprathreshold), and similarly for unpleasant versus non-unpleasant  
240 sounds. We followed an axiomatic approach to identify areas where activity under painful  
241 stimulation could neither be explained by an overlap with activity under non-painful heat (as would  
242 be the case, e.g., in thermosensitive areas), or by an overlap with activity following unpleasant sound  
243 (e.g., in areas processing stimulus salience). In particular, we posited that a region can be  
244 characterized as preferentially pain-processing if the following conditions hold:

- 245     ▪ Axiom 1: The effect of suprathreshold – i.e., painful – stimulation should be larger than that  
246       of subthreshold – i.e., heat – stimulation.
- 247     ▪ Axiom 2: The effect of suprathreshold heat stimulation should be larger than that of  
248       suprathreshold sound stimulation.
- 249     ▪ Axiom 3: The relationship of ratings and BOLD – i.e., the slope of the stimulus response  
250       function – should be stronger for suprathreshold heat than for subthreshold heat.



251       ▪ Axiom 4: The relationship of ratings and BOLD should be stronger for suprathreshold heat  
252            than for suprathreshold sound.

253 Each of the axioms was evaluated at a significance threshold of  $p=0.05$ , corrected for family-wise  
254 error. After joint application of each axiom, analysis revealed activation in the posterior parietal  
255 operculum ( $x=56, y=-37, z=25, Z=5.519, p(\text{corrected})=0.035$ ) (Figure 7), adjacent to the supramarginal  
256 gyrus.

257

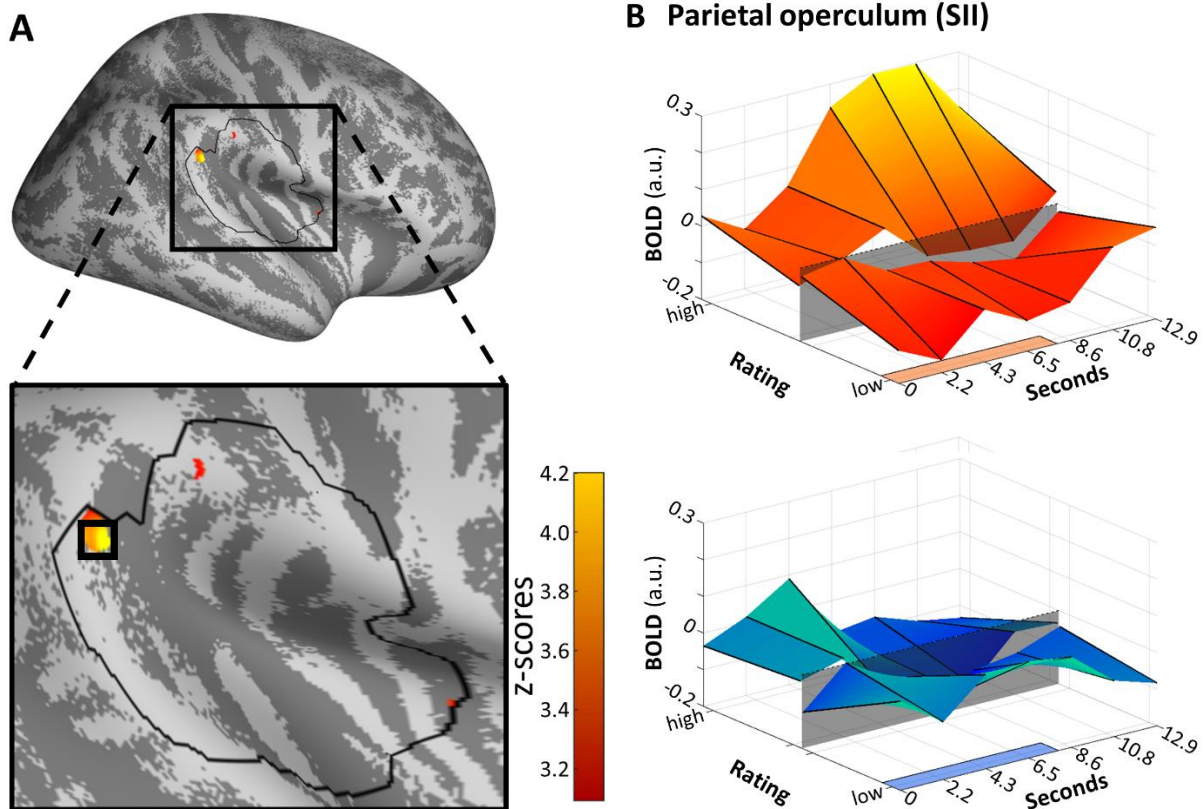

258

259 **Figure 7.** Areas that fulfill the axiomatic requirements of differential activation during pain compared to heat  
260 and sound. In detail, these axioms were 1) a larger effect of suprathreshold heat compared to subthreshold  
261 heat, 2) a larger effect of suprathreshold heat compared to suprathreshold sound, 3) a stronger relationship of  
262 BOLD with pain ratings than with heat ratings, 4) a stronger relationship of BOLD with pain ratings than with  
263 unpleasantness ratings. Significant activation was found in the parietal operculum (H1). **A.** Activations are  
264 thresholded at  $p(\text{uncorrected})<0.001$  and overlaid on an average brain surface. The black line delineates the  
265 SVC mask. See S5 Figure for peak positions in brain volume slices. **B.** Poststimulus plots of fMRI activation in

266 vertex H1 during heat (orange) and sound (blue). The shaded patch in the center signifies the pain threshold  
267 (for heat) and unpleasantness threshold (for sound). The colored patches at the right axes show the stimulus  
268 duration.

269

## 270 **Discussion**

271 This study aimed to identify regions relevant for heat pain processing, and to determine whether  
272 their activation can be explained by salience. We used individually calibrated, parametrically graded  
273 heat stimuli, and an auditory control condition. Heat and sound stimuli were matched for arousal as  
274 indicated by similar skin conductance responses. Furthermore, we employed surface-based analyses  
275 to mitigate spatial inaccuracies of 3D smoothing.

276 Main effects for heat were identified in the parietal operculum and the posterior insula, main effects  
277 of acoustic stimuli were observed in the superior temporal gyrus. More importantly, in the parietal  
278 operculum, we observed a differential correlation of brain activity with ratings above versus below  
279 the heat pain threshold, concurrent with a differential correlation with ratings under painful heat  
280 versus unpleasant sound. As we have matched both modalities for salience, these results  
281 unequivocally rule out that activity in this area is simply related to stimulus salience, and suggests a  
282 more dedicated role in heat pain processing.

283 Using SCR as an autonomic readout of arousal [15,20,21] allowed us to establish comparable salience  
284 of the stimulus material, independent of any behavioral assessments. Although salience can be  
285 assessed psychometrically [5] and research exists to establish concurrent validity of salience ratings  
286 within individual modalities [22], to our knowledge, such ratings have not been validated cross-  
287 modally. It is likely that salience ratings are scaled differently according to some modality-specific  
288 perceptual range. Our results support this notion, as we have observed a prevailing difference in  
289 behavioral ratings between the two modalities (sound was, on average, rated as more aversive, but

290 had a shallower slope with increasing intensities). This means that a reliance on behavioral ratings  
291 alone could compound SCR dissimilarities between comparator modalities.

292 With six graded stimulus intensities per modality, our design allowed for the assessment of stimulus  
293 response functions as opposed to simple mean comparisons between a single intensity and a low-  
294 level baseline, or between single sub- and suprathreshold stimuli. Apart from physical intensities, this  
295 also allowed us to use a large range of individual ratings as predictors. Using these perceived  
296 intensities, we were able to directly investigate competing modes of encoding. For example, a brain  
297 area may encode heat intensity, regardless of pain, or it may be inactive below threshold but encode  
298 pain intensity above threshold [12,13,23]. In the analysis distinguishing between sub- and  
299 suprathreshold stimuli, we see a clear pain-intensity-related response in the parietal operculum  
300 (Figure 7). While not a main focus of this paper, we do see a shift in SRFs even within small cortical  
301 distances: For example, an area rostral ( $x=55, y=-26, z=26$ ) to the more heat pain-dedicated posterior  
302 parietal operculum ( $x=56, y=-37, z=25$ ) fails to register differences in the parametric modulation by  
303 sub- and suprathreshold heat (Figure 8).

304

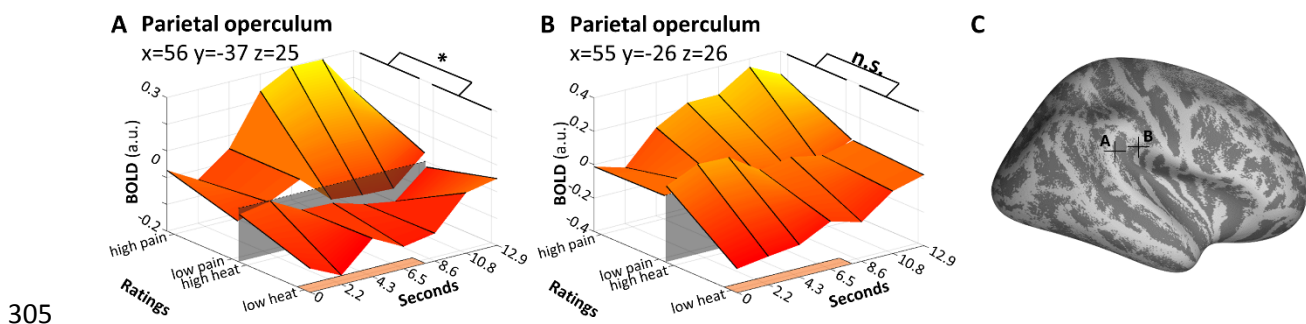

306 **Figure 8.** Distinction of areas with stimulus response functions corresponding to the axioms, or not (heat  
307 modality only). A. The slopes of subthreshold (heat) versus suprathreshold (pain) activation as described in  
308 Figure 7. Heat slopes are shallower than pain slopes. B. Slopes of heat and pain activation in an opercular  
309 vertex slightly anterior to A, as determined per conjunction of heat and pain parametric modulation. Slopes are  
310 more aligned, preventing the contrasted activation (pain>heat) of reaching significance. Note that this is not a

311 formal comparison to A. **C.** Location of the vertices described in A and B. B is in an adjacent area about 1 cm  
312 surface distance rostral from A.

313

314 Areas in the insula and surrounding cortical areas are characterized by extreme cortical folding. We  
315 therefore implemented a subject specific surface-based fMRI analysis. This prevents contamination  
316 of gray matter voxels by signal from white matter and cerebrospinal fluid. Furthermore, surface-  
317 based analyses circumvent potential issues arising from three-dimensional smoothing which  
318 accidentally mixes signals from structures adjacent in three-dimensional space which are actually  
319 distant from each other. For example, the parietal operculum is directly adjacent to the superior  
320 temporal gyrus in three-dimensional space, but their neurons are separated by the entire insular  
321 fold. Smoothing with a three-dimensional kernel therefore includes activity across the lateral sulcus  
322 (alongside noise from white matter and corticospinal fluid), thereby increasing error terms and  
323 decreasing sensitivity of the respective comparisons. Importantly, in this case, three-dimensional  
324 smoothing could also generate erroneous overlaps between conditions. Surface-based analyses have  
325 been found to increase sensitivity and reduce deviations when normalizing from native to standard  
326 space [24].

327 In contrast to previous multimodal studies, we explicitly chose modalities where the aversiveness  
328 would be generated by virtue of physical intensity. This is naturally the case with painful stimulation,  
329 but several studies did not use aversive stimulation in non-painful control modalities (for example  
330 [9], who used low-intensity tactile stimulation). Consequently, the acoustic modality was chosen  
331 because stimuli can be generated in close analogy to heat, by altering the physical intensity of the  
332 stimuli.

333 For our analyses of neuronal activity, we have focused on the posterior insula and adjacent areas.

334 The insula is of particular interest, because its involvement in pain has been well-documented  
335 [4,9,25]. Furthermore, it has been hypothesized to perform polymodal magnitude estimation [23,26],

336 and is also involved in salience processes [27,28]. Unambiguous data concerning the involvement of  
337 the insular cortex in pain processing also comes from direct cortical stimulation studies [29–31].  
338 Consequently, it is a prime candidate to assess overlaps and differences in activation patterns.

339 With its reliable activation following painful stimulation, we can unequivocally establish the parietal  
340 operculum as an important area of heat pain processing, whose activity cannot be explained by  
341 stimulus salience. The area not only shows increased activation when comparing pain and other  
342 modalities (heat, sound), but also exhibits a monotonic increase with perceived pain. The peak of the  
343 BOLD response following pain clearly coincides with the largest modulation by behavioral ratings of  
344 pain, roughly 8 seconds after stimulus onset (Figure 7B). Importantly, this area has close functional  
345 connections with the posterior insula [32], another area of interest [9,16].

346 Interestingly, we were not able to replicate earlier findings [5,33] of substantial overlap of activation  
347 regardless of modality, even at a lower threshold. This might be related to the differences in stimulus  
348 parameters between the studies: Previous multisensory studies have used rapid onset stimuli of very  
349 short duration, whereas ours were considerably longer (8 seconds plateau, circa 9.5 seconds with  
350 upward/downward slopes). It is possible that with increasing brevity and suddenness of the stimuli,  
351 the extent of unspecific orientation responses and other attention related processes is  
352 disproportionally larger, and therefore a larger overlap of neuronal activation can be observed [34]. If  
353 true, this overlap would naturally be determined, to a large extent, by unspecific and not pain-  
354 related activations such as salience.

355 Brain responses evoked by stimuli in different sensory modalities might follow different time courses;  
356 systematic differences may, for example, arise from different conduction speeds of fibers relaying  
357 auditory (mostly very fast A $\alpha$  fibers), thermoceptive (mostly slow C fibers) and nociceptive input (A $\delta$   
358 and C fibers), compounded by the fact that thermal stimulation (in this setup) occurs at a distal site  
359 compared to auditory stimulation. Therefore, in analogy to [5], we opted for analyzing the time-  
360 course of all imaging data by using finite impulse responses as basis functions. This largely avoids the

361 constraints and biases implicit in comparing mean activations obtained by pre-defined hemodynamic  
362 response functions.

363 Some limitations apply to the present research.

364 The study used stimuli of mild to moderate aversiveness (calibrated to a maximum of 50 if rescaled  
365 to a conventional, 0-100 suprathreshold visual analogue scale). This aspect, too, could be amended  
366 to cover a broader range, albeit increasing the risk of carry-over effects such as sensitization,  
367 particularly with longer stimulus duration. Additionally, the use of only a single trial-based, post-  
368 stimulus rating of stimulus intensity could be criticized. In fact, one common recommendation for  
369 pain measurement is to distinguish multiple pain dimensions [1], most frequently intensity and  
370 unpleasantness [35], although these aspects tend to be highly correlated in non-interventional  
371 designs [36,37]. Given the SCR-based approach to equalize salience and to include more stimulus  
372 repetitions, we opted against multiple VAS for protocol reasons, namely ease of measurement and to  
373 avoid confusion.

374 While we have identified areas preferentially active in painful heat as compared to unpleasant  
375 sound, we cannot claim that these areas are specific for pain. In fact, it is important to note that  
376 specificity cannot be ascertained with a limited number of control conditions [10,38]. We concur that  
377 the notion of specificity is more academic in nature than might benefit the field [3]. The preferences  
378 of certain areas to process various inputs – whether visual, acoustic, nociceptive – is best construed  
379 as a matter of degree, that is, a question of specialization rather than specificity, as has been  
380 suggested for functions unrelated to pain [39]. Nevertheless, the rigorous axiomatic approach allows  
381 for a strong hypothesis ascribing the parietal operculum a dedicated role in pain processing.

382

## 383 **Materials and Methods**

384 The protocol was approved by the local Ethics Committee (Ethikkommission der Ärztekammer  
385 Hamburg, vote PV4745) and conformed to the standards laid out by the World Medical Association in  
386 the Declaration of Helsinki. Participants gave written informed consent prior to participation.

387

### 388 *Exclusion criteria*

389 A list of exclusion criteria is provided in Table 1.

390

391 **Table 1.** Exclusion criteria.

- Age younger than 18, older than 40
- Sufficient visual acuity, correction with contact lenses only
- Conditions disqualifying for MR-scanners (e.g. claustrophobia, wearing a pacemaker)
- Ongoing participation in pharmacological studies, or regular medication intake (e.g. analgesics)
- Analgesics use 24h prior to the experiment
- Pregnancy or breastfeeding
- Chronic pain condition
- Manifest depression (as per Beck Depression Inventory II, BDI-II, cutoff 14 as per [40])
- Somatic symptom disorder (as per Patient Health Questionnaire, PHQ15, cutoff 10 as per [41])
- Other neurological, psychiatric or dermatological conditions
- Inner ear conditions
- Head circumference >60 cm (for second cohort, due to device constraints)

392

393 *Psychophysiological recordings*

394 Electrodermal activity was measured with MRI-compatible electrodes on the thenar and hypothenar  
395 of the left hand. Electrodes were connected to Lead108 carbon leads (BIOPAC Systems, Goleta, CA,  
396 USA). The signal was amplified with an MP150 analog amplifier (also BIOPAC Systems). It was  
397 sampled at 1000 Hz using a CED 1401 analog-digital converter (Cambridge Electronic Design,  
398 Cambridge, UK) and downsampled to 100 Hz for analysis.

399 Analysis was performed using the Ledalab toolbox for MATLAB [42]. Single subject data were  
400 screened for artifacts which were removed if possible by using built-in artifact correction algorithms.  
401 Using a deconvolution procedure, we computed phasic skin conductance (SCR). SCR occurring after  
402 stimulus onset and within stimulus duration was used for measuring autonomic arousal as a proxy  
403 for stimulus salience. Response windows were defined by visual inspection, per modality: between  
404 2.0 s and 4.5 s for heat, and between 1.5 s and 4.0 s for sound. Results were log- and z-transformed  
405 to reduce the impact of intra- and interindividual outliers [15]. Subsequently, SCR was averaged  
406 within subjects for two modalities (heat/sound) and six stimulus intensities each, yielding twelve  
407 values per person.

408 SCR was used because it is an objective measure of general sympathetic activity, and therefore a  
409 measure of arousal and stimulus salience [15,20,21] which is routinely used in assessing painful  
410 [14,43,44] as well as acoustic stimulation [45].

411

412 *fMRI acquisition and preprocessing*

413 Functional and anatomical imaging was performed using a TRIO 3T MR Scanner (Siemens, Erlangen,  
414 Germany) with a 12-channel head coil. An fMRI sequence of 36 transversal slices of 2 mm thickness  
415 was acquired using T2\*-weighted gradient echo-planar imaging (EPI; 2150 ms TR, 25 ms TE, 80° flip  
416 angle, 2x2x2 mm voxel size, 1 mm gap, 216x216x107 mm field of view, acceleration factor of 2 with  
417 generalized autocalibrating partially parallel acquisitions reconstruction, GRAPPA). Coverage did not



418 include the apical parts of the frontal/parietal lobes. Additionally, a T1-weighted MPRAGE anatomical  
419 image was obtained for the entire head (voxel size 1x1x1 mm, 240 slices).

420 For each subject, fMRI volumes were realigned to the mean image in a two-pass procedure, and co-  
421 registered to the anatomical image using affine transformations. Anatomical images were segmented  
422 into tissue types, and individual brain surfaces generated, using the CAT12 toolbox for SPM (Christian  
423 Gaser & Robert Dahnke, <http://www.neuro.uni-jena.de/cat/>).

424

#### 425 *Analysis of imaging data*

426 Subject-level analyses were performed on the 3D (volume) data in native space without smoothing,  
427 using an implicit mask at 0.6 to facilitate subsequent (surface) processing. We computed general  
428 linear models to identify brain structures involved in the processing of each stimulus modality, as  
429 well as the encoding of intensities within those modalities (volume data not shown). All analyses  
430 were performed with seventh order FIR basis functions, of which bins 2 to 6 are considered when  
431 comparing conditions. This amounts to seconds 4.3 through 12.9 post stimulus onset. Realignment  
432 (motion) parameters as well as regressors obtained from ventricular motion were included as  
433 nuisance variables, to mitigate motion-related artifacts.

434 We first set up a model including one regressor for stimulus main effects in each modality. Another  
435 two regressors – one linear, one quadratic – encoding stimulus intensities 1 through 6 were added  
436 per modality, as parametric modulators. The second model likewise included main effects, and  
437 behavioral ratings as linear and quadratic parametric modulators. Finally, the third model further  
438 distinguished the two modalities in stimuli perceived as below and above the respective thresholds  
439 (pain for heat stimuli, unpleasantness for sound stimuli), yielding four main effect regressors  
440 (subthreshold heat, suprathreshold heat – i.e., pain –, subthreshold sound, suprathreshold sound).  
441 Behavioral ratings were again included as linear parametric modulators; quadratic modulation was  
442 not considered to preclude overfitting.

443 Results from subject-level analyses were mapped to brain surfaces obtained via the CAT12  
444 segmentation procedure. The mapped subject-level results were then resampled to correspond to  
445 surface cortical templates, and smoothed with a 6 mm full width-half maximum 2D kernel. Group-  
446 level analyses were performed including the mapped contrasts, which are described in the Results  
447 section.

448 Masking was used to distinguish either modality, as the ANOVAs employed are unsigned and in  
449 principle detect differences in activation regardless of direction. Therefore, we obtained signed (that  
450 is, unconstrained by p values) masks from calculating a conjunction from significant voxels of a) a t-  
451 test contrasting the average main effects of either modality (i.e., where activation following heat was  
452 larger than that following sound, and vice versa), and b) a t-test contrasting either modality to low-  
453 level baseline (i.e., where activation following heat – or sound, respectively – was larger than zero.  
454 This yielded a single mask for both modalities, which was applied to all analyses (unless otherwise  
455 noted) (S1B Figure).

456 For the purpose of this study, we focused on the hemisphere contralateral to the stimulation, in our  
457 case the right hemisphere. In general, the larger part of activity following pain is contralateral to the  
458 stimulation site, but is known to be bilateral in several key areas such as the secondary  
459 somatosensory cortex and the insula [46].

460 Furthermore, we focused on the insula and directly adjacent areas for small volume correction of  
461 significance level. In particular, we included the granular insular cortex (I<sub>g1</sub>, I<sub>g2</sub>) as well as the  
462 parietal operculum (OP1, OP2) and primary auditory cortex (Te1.1), using the SPM Anatomy Toolbox  
463 (version 2.2b [47]). This mask was mapped to a template brain surface, then smoothed with a 4 mm  
464 2D kernel to close gaps. The resulting binary mask (S1A Figure) was roughly centered around  
465 previously reported coordinates (x=[-]34, y=-20, z=18) involving areas putatively dedicated to pain  
466 processing [9]. It was used for small volume correction of second level analyses, where results were  
467 considered after correction for family-wise error rate of p<0.05.

468 *Psychometry*

469 Owing to the study's aim to compare two stimulus modalities (heat and sound), they had to be  
470 presented and rated in an analogous fashion. Therefore, while retaining the intuitive descriptor  
471 "painfulness" for rating noxious heat (as composite measure of intensity and unpleasantness), we  
472 settled on "unpleasantness" as descriptor for sounds. This also seemed warranted considering the  
473 high correlation of intensity and unpleasantness measures in heat pain [37], while unpleasantness is  
474 one of the definitional criteria of pain [2].

475 Furthermore, since we wanted to use graded stimuli both below and above the respective thresholds  
476 (pain threshold for heat, unpleasantness threshold for sound), we deviated from the more common  
477 simple visual analogue scales (VAS) and devised two partitioned 0 to 100 VAS for both modalities  
478 (Figure 1A).

479 For heat, it captured both painful and non-painful sensations. Subjects were instructed to indicate  
480 heat intensity in absence of pain in the 0 through 49 range, and heat pain intensity in the 50 through  
481 100 range. Hence, anchors were displayed for "no sensation" (0), "minimal pain" (50), and  
482 "unbearable pain" (100). Pain was operationalized as the presence of sensations other than pure  
483 heat intensity, such as stinging or burning, as per the guidelines of the German Research Network on  
484 Neuropathic Pain [48].

485 Likewise, for sound, both unpleasant and non-unpleasant sensations were captured by the VAS.  
486 Subjects were instructed to indicate loudness in absence of unpleasantness in the 0 through 49  
487 range, and loudness unpleasantness in the 50 through 100 range. Anchors were displayed for  
488 "inaudible" (0), "minimally unpleasant" (50), and "extremely unpleasant" (100). Unpleasantness was  
489 operationalized as a bothersome quality of the sound emerging at a certain loudness.

490

491

492 *Heat stimuli and calibration*

493 Heat stimuli were delivered using a CHEPS thermode (Medoc, Ramat-Yishai, Israel). Stimulation sites  
494 were located on the radial surface of the forearm. Three separate sites were used for calibration and  
495 either experimental session, to avoid changes in heat/pain perception due to repeated stimulation.  
496 Around the middle of the forearm (half distance between crook of the arm and distal wrist crease;  
497 see Figure 1B), three stimulation sites were marked prior to the experimental sessions. For  
498 calibration, a medial site on the distal part of the forearm was used; for experimental sessions 1 and  
499 2, two adjacent proximal sites were used, in counterbalanced order. During both calibration  
500 procedure and experimental sessions, baseline temperature was set to 35°C, and rise and fall rate  
501 were set to 15°C per second. The duration of heat stimuli was set to eight seconds at target  
502 temperature (plateau), except for preexposure stimuli whose plateau duration was zero (and thus  
503 only consisted of temperature up- and downramping).

504 A two-step stimulus calibration was performed for each subject, to determine three temperatures  
505 below the individual pain threshold, and three above. Calibration was performed with the MR-  
506 scanner running the same sequence as during the actual experimental sessions, to mimic ambient  
507 conditions [49]. fMRI data from calibration was later discarded.

508 In a first calibration step, the pain threshold was determined. Subjects were preexposed to four brief  
509 heat stimuli. Preexposure started at 42°C and each consecutive stimulus was increased by 0.5°C, up  
510 to 43.5°C. If a subject indicated the last stimulus as painful, starting temperature for the following  
511 procedure was set to 43°C, else to 44°C. We then used a probabilistic tracking procedure for  
512 threshold determination, assuming a normal distribution of pain perception around the actual  
513 threshold [50]. Eight full-length stimuli were presented and received a binary rating (painful or not  
514 painful). Depending on the rating of the previous stimulus, each consecutive stimulus was set to a  
515 higher or lower temperature according to the probability informed by previous pivot points. The final  
516 temperature was defined as threshold intensity.

517 In a second calibration step, eight stimuli unevenly spaced around threshold intensity (from -2°C to  
518 +1.6°C, with smaller intervals towards  $\pm 0^\circ\text{C}$ ) were rated on the partitioned VAS described above.  
519 After the procedure, linear regression was used to calculate target temperatures H1 through H6, to  
520 obtain subthreshold VAS ratings of 25, 35 and 45 (H1–H3), and suprathreshold VAS ratings of 55, 65  
521 and 75 (H4–H6).

522 These six intensities were used throughout the experimental sessions.

523

#### 524 *Sound stimuli and calibration*

525 Sound stimuli were delivered using MR-compatible headphones (NordicNeuroLabs, Bergen, Norway).  
526 A pure sound (frequency 1000 Hz, sampling rate 22050 Hz) was generated using MATLAB. A log  
527 function was used to translate increases in (physical) amplitude to smooth gradual increases in  
528 (psychoacoustic) loudness, to mimic the heat stimuli's temperature ramps. Like the heat stimuli,  
529 sound stimuli were presented for eight seconds at target loudness (plateau), and the scanner was  
530 running a dummy EPI sequence throughout to mimic actual conditions [51].

531 A two-step stimulus calibration was performed for each subject, to determine three sounds below  
532 the individual unpleasantness threshold, and three above. The general procedure was analogous to  
533 the one used for heat.

534 In a first calibration step, the individual loudness unpleasantness threshold (in percent of maximum  
535 amplitude of  $\sim 100$  dB, allowing for safe exposure even at maximum intensities [52]) was determined  
536 by an ascending methods of limits-procedure. Six sounds of gradually increasing loudness were  
537 played. The calibration sounds differed in the steepness of the loudness ramps, taking between 9 and  
538 15 seconds to reach peak amplitude. Subjects were asked to indicate the point where the loudness  
539 became unpleasant. The mean of the last four of the six stimuli was defined as threshold loudness.

540 In a second calibration step, 16 stimuli unevenly spaced around threshold loudness were presented  
541 (from -15% to +15%, smaller intervals towards  $\pm 0\%$ ), with stimulus characteristics set to mimic those  
542 of heat stimuli (roughly 0.75 s ramps up and down, plus 8 s plateau loudness). As with heat ratings,  
543 linear regression was used to calculate target amplitudes S1 through S6, namely to obtain  
544 subthreshold VAS ratings of 25, 35 and 45 (S1–S3), and suprathreshold VAS ratings of 55, 65 and 75  
545 (S4–S6). For the second cohort, VAS targets were informed by the corresponding mean SCR  
546 amplitude of the first cohort (see “Differences between first and second cohort”).

547 Finally, ramping characteristics of sound stimuli (the seconds it took to plateau) were set to  
548 correspond to those of the respective intensity’s heat stimuli, such that corresponding intensities of  
549 both modalities had an identical overall length (ramps plus plateau).

550

#### 551 *Stimulus presentation during experimental sessions*

552 After calibration, the thermode stimulation site was changed, and the first experimental session  
553 commenced. Heat and sound stimuli were presented in alternation, so that trials of the same  
554 modality were spaced with an intertrial interval of approximately 30 seconds. Each trial followed the  
555 same basic structure (Figure 1C).

556 Within each modality, the six intensities were pseudorandomized in microblocks. Randomization was  
557 performed such that each sequence of six stimuli contained one instance of each intensity. It was  
558 further constrained such that the very first stimulus was never chosen from the highest two  
559 intensities, and two consecutive intensities were never more than 3 intensity steps different (e.g.,  
560 the intensity following heat intensity 1 could not exceed heat intensity 4).

561 After changing thermode stimulation site again, session 2 commenced with identical protocol (albeit  
562 different randomization).

563 Visual cues and VAS rating scales were displayed in the scanner using back-projection via a 45° mirror  
564 placed atop the head coil.

565

566 *Selection of subsample for analysis with comparable SCR between modalities*

567 In total we assessed two cohorts of 32 subjects and 26 subjects. To obtain an “SCR-equalized”  
568 subsample from all subjects (N=58 with 2 sessions, that is a total of 116 experimental sessions), in a  
569 first step, we excluded all sessions where the correlation between ratings (that is, perceived stimulus  
570 intensity/unpleasantness) and SCR was lower than or equal to zero, so that only subjects with a  
571 positive correlation in both modalities were eligible for the next step.

572 In a second step, we used Bayes factors [53,54] to determine the flipping point where modality  
573 became obsolete as explanatory variable. Bayes factors express the ratio of the marginal likelihood of  
574 the data under the compared models; since they consider the number of free parameters, they allow  
575 for the selection of the “better” model (best fit to the data and most parsimonious). For every  
576 session, we obtained the mean SCR (log-transformed and normalized values) for both modalities;  
577 sessions with the largest predominance of heat-SCR were then consecutively removed. After each  
578 removal, we obtained the Bayes factors for the remaining sample, comparing the model with  
579 intensity only as predictor to that with modality added as predictor. Once the Bayes factor dropped  
580 below 1 (meaning that the addition of modality as predictor did not serve to improve the model), we  
581 stopped the pruning procedure. This relatively permissive criterion for session inclusion was chosen  
582 in order to preserve as many sessions as possible.

583 This procedure yielded a sample where modality did not contribute to explaining the SCR data (as  
584 indicated by recalculating the random intercept model described under “Skin conductance results”),  
585 with 26 unique subjects contributing 33 sessions. From the first cohort, 15 subjects contributed 19  
586 sessions, from the second cohort, 11 subjects contributed 13 sessions to the SCR-equalized analysis.

587

588 *Differences between first and second cohort*

589 Since we had determined that not every person's skin conductance responded to both modalities to  
590 a comparable extent, we set out to select a subsample of persons who had comparable SCR. To reach  
591 a sufficient number of such "responders", we had to perform an additional data collection.

592 Because of logistical reasons (scanner upgrade in January 2018), some parameters of fMRI  
593 acquisition had to be modified for the new PRISMA 3T MR Scanner (Siemens, Erlangen, Germany).  
594 Instead of a 12-channel head coil, we had to employ a 20-channel head coil. Delivery of the auditory  
595 stimulus was performed with a CONFON headphone (Cambridge Research Systems Ltd, Rochester,  
596 United Kingdom). These measures necessitated the exclusion of subjects with head circumference  
597 above 60cm.

598 Furthermore, to facilitate increased SCR responding to sound, we increased the amplitude of the  
599 sound stimuli. Using calibration data from the first data collection and linear extrapolation, we  
600 calculated sound VAS targets required to induce SCRs of an amplitude comparable to those of heat  
601 VAS targets of the same intended intensity 1 through 6. We determined that corresponding to our  
602 heat VAS targets of 25, 35, 45, 55, 65, 75 (see "Heat stimuli and calibration"), we would need to apply  
603 sound amplitudes inducing sound VAS targets of 48, 59, 70, 82, 93, 105. Furthermore, during subject  
604 instruction, we emphasized the fact that the amplitude of sound stimuli was not within pathological  
605 range. This was done to prevent overly cautious subject behavior, following anecdotal evidence from  
606 the first cohort that sound stimuli were associated with higher safety concerns than heat stimuli.

607

608 *Statistical analyses*

609 All analyses were performed using MATLAB (version R2017b) and SPM12 (version 6906).

610 Significance level was set to  $p=0.05$  for psychophysiological and behavioral data, whereas imaging  
611 results were corrected using family-wise error rate adjustment at  $p<0.05$ . For visualization,



612 activations are thresholded at  $p(\text{uncorrected}) < 0.001$  and overlaid on an average brain surface. All  
613 coordinates are reported in Montreal Neurological Institute (MNI) space.

614 Skin conductance data and behavioral ratings were analyzed using linear mixed models with random  
615 intercepts [55], with centering of predictors following recommendations [56].

616 Group-level analyses of imaging data were performed as within-subjects ANOVA (cf. “Analysis of  
617 imaging data” above, and the respective Results sections).

618

### 619 **Acknowledgements**

620 This work was supported by European Research Council Advanced Grant ERC-2010-AdG\_20100407  
621 and Deutsche Forschungsgemeinschaft Grant SFB 936 Project A06. Björn Horing was supported by  
622 the Alexander von Humboldt-Foundation (Feodor Lynen Return Fellowship). We thank Jürgen  
623 Finsterbusch, Katrin Bergholz, Waldemar Schwarz and Kathrin Wendt for technical assistance during  
624 MR data collection, and Lara Austermann, Tim Dretzler, Katharina Ebel and Matthias Kerkemeyer for  
625 their assistance with data collection, and finally Christian Gaser for helpful comments concerning the  
626 CAT12 toolbox.

627

### 628 **Conflicts of interest**

629 The authors declare no conflict of interest.

630

### 631 **Corresponding author**

632 Correspondence should be addressed to Dr. Björn Horing, Department of Systems Neuroscience,  
633 University Medical Center Hamburg-Eppendorf, Martinistrasse 52, 20246 Hamburg, Germany.

634 [b.horing@uke.de](mailto:b.horing@uke.de)

## 635 **References**

- 636 1. Moayedi M, Davis KD. Theories of pain: from specificity to gate control. *J Neurophysiol.*  
637 2013;109(1):5–12. doi: 10.1152/jn.00457.2012
- 638 2. International Association for the Study of Pain (IASP). Pain terms: a list with definitions and  
639 notes on usage. Recommended by the IASP Subcommittee on Taxonomy. *Pain.* 1979;6(3):249.
- 640 3. Tracey I, Mantyh PW. The cerebral signature for pain perception and its modulation. *Neuron.*  
641 2007;55(3):377–91. doi: 10.1016/j.neuron.2007.07.012
- 642 4. Garcia-Larrea L, Peyron R. Pain matrices and neuropathic pain matrices: A review. *Pain.*  
643 2013;154:S29–43. doi: 10.1016/j.pain.2013.09.001
- 644 5. Mouraux A, Diukova A, Lee MC, Wise RG, Iannetti GD. A multisensory investigation of the  
645 functional significance of the “pain matrix.” *Neuroimage.* 2011;54(3):2237–49. doi:  
646 10.1016/j.neuroimage.2010.09.084
- 647 6. Legrain V, Iannetti GD, Plaghki L, Mouraux A. The pain matrix reloaded: A salience detection  
648 system for the body. *Prog Neurobiol.* 2011;93(1):111–24. doi:  
649 10.1016/j.pneurobio.2010.10.005
- 650 7. Davis KD, Bushnell MC, Iannetti GD, St Lawrence K, Coghill R. Evidence against pain specificity  
651 in the dorsal posterior insula. *F1000Research.* 2015;4(2):362. doi:  
652 10.12688/f1000research.6833.1
- 653 8. Salomons T V., Iannetti GD, Liang M, Wood JN. The “pain matrix” in pain-free individuals.  
654 *JAMA Neurol.* 2016;73(6):4–5. doi: 10.1001/jamaneurol.2016.0653
- 655 9. Segerdahl AR, Mezue M, Okell TW, Farrar JT, Tracey I. The dorsal posterior insula subserves a  
656 fundamental role in human pain. *Nat Neurosci.* 2015;18(4):499–500. doi: 10.1038/nn.3969
- 657 10. Mouraux A, Iannetti GD. The search for pain biomarkers in the human brain. *Brain.*

- 658 2018;141(12):3290–307. doi: 10.1093/brain/awy281
- 659 11. Büchel C, Geuter S, Sprenger C. Comparing Painful Stimulation vs Rest in Studies of Pain.  
660 JAMA Neurol. 2016;73(10):1258. doi: 10.1001/jamaneurol.2016.2989
- 661 12. Bornhövd K, Quante M, Glauche V, Bromm B, Weiller C, Büchel C. Painful stimuli evoke  
662 different stimulus-response functions in the amygdala, prefrontal, insula and somatosensory  
663 cortex: a single-trial fMRI study. Brain. 2002;125(Pt 6):1326–36.
- 664 13. Loggia ML, Edwards RR, Kim J, Vangel MG, Wasan AD, Gollub RL, et al. Disentangling linear  
665 and nonlinear brain responses to evoked deep tissue pain. Pain. 2012;153(10):2140–51. doi:  
666 10.1016/j.pain.2012.07.014
- 667 14. Tiemann L, Hohn VD, Ta Dinh S, May ES, Nickel MM, Gross J, et al. Distinct patterns of brain  
668 activity mediate perceptual and motor and autonomic responses to noxious stimuli. Nat  
669 Commun. 2018;9(1):4487. doi: 10.1038/s41467-018-06875-x
- 670 15. Boucsein W. Electrodermal activity. 2nd ed. New York: Springer; 2012.
- 671 16. Bastuji H, Frot M, Perchet C, Hagiwara K, Garcia-Larrea L. Convergence of sensory and limbic  
672 noxious input into the anterior insula and the emergence of pain from nociception. Sci Rep.  
673 2018;8(1):13360. doi: 10.1038/s41598-018-31781-z
- 674 17. Bastuji H, Frot M, Perchet C, Magnin M, Garcia-Larrea L. Pain networks from the inside:  
675 Spatiotemporal analysis of brain responses leading from nociception to conscious perception.  
676 Hum Brain Mapp. 2016;37(12):4301–15. doi: 10.1002/hbm.23310
- 677 18. Pomares FB, Faillenot I, Barral FG, Peyron R. The “where” and the “when” of the BOLD  
678 response to pain in the insular cortex. Discussion on amplitudes and latencies. Neuroimage.  
679 2013;64:466–75. doi: 10.1016/j.neuroimage.2012.09.038
- 680 19. Roy M, Shohamy D, Daw N, Jepma M, Wimmer GE, Wager TD. Representation of aversive  
681 prediction errors in the human periaqueductal gray. Nat Neurosci. 2014;17(11):1607–12. doi:

- 682 10.1038/nn.3832
- 683 20. D'Hondt F, Lassonde M, Collignon O, Dubarry A-S, Robert M, Rigoulot S, et al. Early brain-body  
684 impact of emotional arousal. *Front Hum Neurosci*. 2010;4:33. doi:  
685 10.3389/fnhum.2010.00033
- 686 21. Bradley MM, Codispoti M, Cuthbert BN, Lang PJ. Emotion and motivation I: Defensive and  
687 appetitive reactions in picture processing. *Emotion*. 2001;1(3):276–98. doi: 10.1037/1528-  
688 3542.1.3.276
- 689 22. Kayser C, Petkov CI, Lippert M, Logothetis NK. Mechanisms for Allocating Auditory Attention:  
690 An Auditory Saliency Map. *Curr Biol*. 2005;15(21):1943–7. doi: 10.1016/j.cub.2005.09.040
- 691 23. Baliki MN, Geha PY, Apkarian A V. Parsing pain perception between nociceptive  
692 representation and magnitude estimation. *J Neurophysiol*. 2009;101(2):875–87. doi:  
693 10.1152/jn.91100.2008
- 694 24. Hutchison JL, Hubbard NA, Brigante RM, Turner M, Sandoval TI, Hillis GAJ, et al. The efficiency  
695 of fMRI region of interest analysis methods for detecting group differences. *J Neurosci*  
696 *Methods*. 2014;226:57–65. doi: 10.1016/j.jneumeth.2014.01.012
- 697 25. Geuter S, Boll S, Eippert F, Büchel C. Functional dissociation of stimulus intensity encoding and  
698 predictive coding of pain in the insula. *Elife*. 2017;6. doi: 10.7554/eLife.24770
- 699 26. Moayedi M, Weissman-Fogel I. Is the insula the “how much” intensity coder? *J Neurophysiol*.  
700 2009;102(3):1345–7. doi: 10.1152/jn.00356.2009
- 701 27. Taylor KS, Seminowicz DA, Davis KD. Two systems of resting state connectivity between the  
702 insula and cingulate cortex. *Hum Brain Mapp*. 2009;30(9):2731–45. doi: 10.1002/hbm.20705
- 703 28. Eckert MA, Menon V, Walczak A, Ahlstrom J, Denslow S, Horwitz A, et al. At the heart of the  
704 ventral attention system: the right anterior insula. *Hum Brain Mapp*. 2009;30(8):2530–41. doi:  
705 10.1002/hbm.20688

- 706 29. Mazzola L, Isnard J, Peyron R, Mauguière F. Stimulation of the human cortex and the  
707 experience of pain: Wilder Penfield's observations revisited. *Brain*. 2012;135(2):631–40. doi:  
708 10.1093/brain/awr265
- 709 30. Mazzola L, Faillenot I, Barral F-G, Mauguière F, Peyron R. Spatial segregation of somato-  
710 sensory and pain activations in the human operculo-insular cortex. *Neuroimage*.  
711 2012;60(1):409–18. doi: 10.1016/j.neuroimage.2011.12.072
- 712 31. Ostrowsky K, Magnin M, Ryvlin P, Isnard J, Guenot M, Mauguière F. Representation of pain  
713 and somatic sensation in the human insula: a study of responses to direct electrical cortical  
714 stimulation. *Cereb Cortex*. 2002;12(4):376–85.
- 715 32. Garcia-Larrea L, Mauguière F. Pain syndromes and the parietal lobe. In: *Handbook of Clinical*  
716 *Neurology*. 2018 [cited 2019 Jan 18]. p. 207–23. doi: 10.1016/B978-0-444-63622-5.00010-3
- 717 33. Liberati G, Klöcker A, Safronova MM, Ferrão Santos S, Ribeiro Vaz J-G, Raftopoulos C, et al.  
718 Nociceptive Local Field Potentials Recorded from the Human Insula Are Not Specific for  
719 Nociception. Apkarian AV, editor. *PLOS Biol*. 2016;14(1):e1002345. doi:  
720 10.1371/journal.pbio.1002345
- 721 34. Baliki MN, Geha PY, Fields HL, Apkarian AV. Predicting value of pain and analgesia: Nucleus  
722 accumbens response to noxious stimuli changes in the presence of chronic pain. *Neuron*.  
723 2010;66(1):149–60. doi: 10.1016/j.neuron.2010.03.002
- 724 35. Price DD, McGrath PA, Rafii A, Buckingham B. The validation of visual analogue scales as ratio  
725 scale measures for chronic and experimental pain. *Pain*. 1983;17(1):45–56. doi:  
726 10.1016/0304-3959(83)90126-4
- 727 36. Duncan GH, Bushnell CM, Lavigne GJ. Comparison of verbal and visual analogue scales for  
728 measuring the intensity and unpleasantness of experimental pain. *Pain*. 1989;37(3):295–303.  
729 doi: 10.1016/0304-3959(89)90194-2

- 730 37. Quiton RL, Greenspan JD. Across- and within-session variability of ratings of painful contact  
731 heat stimuli. *Pain*. 2008;137(2):245–56. doi: 10.1016/j.pain.2007.08.034
- 732 38. Lashkari D, Vul E, Kanwisher N, Golland P. Discovering structure in the space of fMRI  
733 selectivity profiles. *Neuroimage*. 2010;50(3):1085–98. doi: 10.1016/j.neuroimage.2009.12.106
- 734 39. Kanwisher N. Functional specificity in the human brain: A window into the functional  
735 architecture of the mind. *Proc Natl Acad Sci*. 2010;107(25):11163–70. doi:  
736 10.1073/pnas.1005062107
- 737 40. Beck AT, Steer RA, Brown GK. Manual for the Beck Depression Inventory-II. San Antonio, TX:  
738 Psychological Corporation Press; 1996.
- 739 41. Kroenke K, Spitzer RL, Williams JBW. The PHQ-15: validity of a new measure for evaluating the  
740 severity of somatic symptoms. *Psychosom Med*. 2002;64(2):258–66.
- 741 42. Benedek M, Kaernbach C. A continuous measure of phasic electrodermal activity. *J Neurosci*  
742 *Methods*. 2010;190(1):80–91. doi: 10.1016/J.JNEUMETH.2010.04.028
- 743 43. Geuter S, Gamer M, Onat S, Büchel C. Parametric trial-by-trial prediction of pain by easily  
744 available physiological measures. *Pain*. 2014;155(5):994–1001. doi:  
745 10.1016/j.pain.2014.02.005
- 746 44. Loggia ML, Juneau M, Bushnell MC. Autonomic responses to heat pain: Heart rate, skin  
747 conductance, and their relation to verbal ratings and stimulus intensity. *Pain*.  
748 2011;152(3):592–8. doi: 10.1016/j.pain.2010.11.032
- 749 45. Bach DR, Flandin G, Friston KJ, Dolan RJ. Modelling event-related skin conductance responses.  
750 *Int J Psychophysiol*. 2010;75(3):349–56. doi: 10.1016/J.IJPSYCHO.2010.01.005
- 751 46. Coghill RC, Sang CN, Maisog JM, Iadarola MJ. Pain Intensity Processing Within the Human  
752 Brain: A Bilateral, Distributed Mechanism. *J Neurophysiol*. 1999;82(4):1934–43. doi:  
753 10.1152/jn.1999.82.4.1934

- 754 47. Eickhoff SB, Stephan KE, Mohlberg H, Grefkes C, Fink GR, Amunts K, et al. A new SPM toolbox  
755 for combining probabilistic cytoarchitectonic maps and functional imaging data. *Neuroimage*.  
756 2005;25(4):1325–35. doi: 10.1016/J.NEUROIMAGE.2004.12.034
- 757 48. Rolke R, Magerl W, Campbell KA, Schalber C, Caspari S, Birklein F, et al. Quantitative sensory  
758 testing: A comprehensive protocol for clinical trials. *Eur J Pain*. 2006;10(1):77–88. doi:  
759 10.1016/j.ejpain.2005.02.003
- 760 49. Ellerbrock I, May A. MRI scanner environment increases pain perception in a standardized  
761 nociceptive paradigm. *Brain Imaging Behav*. 2015;9(4):848–53. doi: 10.1007/s11682-014-  
762 9345-5
- 763 50. Awiszus F. TMS and threshold hunting. *Suppl Clin Neurophysiol*. 2003;56:13–23. doi:  
764 10.1016/S1567-424X(09)70205-3
- 765 51. Hall DA, Summerfield AQ, Gonçalves MS, Foster JR, Palmer AR, Bowtell RW. Time-course of  
766 the auditory BOLD response to scanner noise. *Magn Reson Med*. 2000;43(4):601–6.
- 767 52. National Institute for Occupational Safety and Health (NIOSH). Criteria for a Recommended  
768 Standard: Occupational Noise Exposure. Revised Criteria [Internet]. 1998.
- 769 53. Kass RE, Raftery AE. Bayes Factors. *J Am Stat Assoc*. 1995;90(430):773–95. doi:  
770 10.1080/01621459.1995.10476572
- 771 54. Rouder JN, Morey RD. Default Bayes Factors for model selection in regression. *Multivariate*  
772 *Behav Res*. 2012;47(6):877–903. doi: 10.1080/00273171.2012.734737
- 773 55. Raudenbush SW, Bryk AS. *Hierarchical linear models: Applications and data analysis*.  
774 Thousand Oaks, CA: Sage; 2002.
- 775 56. Hofmann DA, Gavin MB. Centering decisions in Hierarchical Linear Models: Implications for  
776 research in organizations. *J Manage*. 1998;24(5):623–41. doi: 10.1177/014920639802400504

777 **Supporting information**

778

779 **S1 Table.** Sample descriptive statistics.

| Questionnaire          | Construct                       | Mean±SD   | Sample range | Possible range                    |
|------------------------|---------------------------------|-----------|--------------|-----------------------------------|
| <b>BDI-II</b> [SR 1,2] | Depression                      | 2.0±2.2   | 0-8          | 0-63                              |
| <b>PHQ15</b> [SR 3]    | Somatization                    | 3.9±2.3   | 0-9          | 0-30                              |
| <b>FPQ</b> [SR 4]      |                                 |           |              |                                   |
| severe                 | Fear of pain                    | 28.9±8.3  | 11-42        | 10-50                             |
| minor                  | Fear of pain                    | 14.0±4.5  | 10-27        | 10-50                             |
| <b>PVAQ</b> [SR 5]     | Pain vigilance and awareness    | 34.6±8.7  | 21-54        | 0-80                              |
| <b>PSQ</b> [SR 6]      | Pain sensitivity                | 45.1±14.8 | 17-73        | 0-140                             |
| <b>PRSS</b> [SR 7]     |                                 |           |              |                                   |
| Catastrophizing        | Pain catastrophizing            | 8.6±5.4   | 2-21         | 0-45, higher more catastrophizing |
| Coping                 | Pain coping                     | 29.8±5.2  | 19-38        | 0-45, higher more active coping   |
| <b>STAI</b> [SR 8,9]   |                                 |           |              |                                   |
| Trait                  | Trait anxiety                   | 32.0±6.9  | 21-49        | 20-80                             |
| State                  | State anxiety (pre experiment)  | 31.5±6.2  | 22-51        | 20-80                             |
| <b>MDMQ</b> [SR 10]    |                                 |           |              |                                   |
| GoodBad A              | Mood: Good vs bad (pre exp.)    | 17.7±1.9  | 12-20        | 4-24, the higher the better       |
| AwakeTired A           | Mood: Awake vs tired (pre exp.) | 15.2±2.9  | 8-19         | 4-24, the higher the more awake   |



|               |                                      |          |       |                                    |
|---------------|--------------------------------------|----------|-------|------------------------------------|
| CalmNervous A | Mood: Calm vs nervous<br>(post exp.) | 16.5±2.6 | 10-20 | 4-24, the higher<br>the calmer     |
| GoodBad B     | Mood: Good vs bad (pre<br>exp.)      | 17.2±1.7 | 12-19 | 4-24, the higher<br>the better     |
| AwakeTired B  | Mood: Awake vs tired<br>(pre exp.)   | 10.1±2.4 | 6-16  | 4-24, the higher<br>the more awake |
| CalmNervous B | Mood: Calm vs nervous<br>(post exp.) | 17.2±2.1 | 12-20 | 4-24, the higher<br>the calmer     |

780

781

782 **S2 Table.** Average calibrated sound intensities 1 through 6, which were used as stimuli during the experiment.

783 Cohort 2 received higher intensities, see Methods for rationale.

| Intensity | Cohort 1<br>(n=15) |                |           | Cohort 2<br>(n=11) |                |            |
|-----------|--------------------|----------------|-----------|--------------------|----------------|------------|
|           | Target VAS         | dBA<br>mean±SD | Range     | Target VAS         | dBA<br>mean±SD | Range      |
| 1         | 25                 | 70.5±7.4       | 57.7-82.9 | 48                 | 86.1±5.9       | 77.8-99.3  |
| 2         | 35                 | 74.2±6.6       | 62.4-85.9 | 59                 | 92.2±5.9       | 81.2-101.5 |
| 3         | 45                 | 77.9±6.0       | 67.2-88.7 | 70                 | 95.6±6.0       | 84.4-102.5 |
| 4         | 55                 | 81.4±5.5       | 70.8-91.2 | 82                 | 97.7±5.0       | 87.7-103.0 |
| 5         | 65                 | 84.8±5.3       | 74.3-93.4 | 93                 | 99.1±3.9       | 90.5-103.0 |
| 6         | 75                 | 87.8±5.2       | 77.8-95.3 | 105                | 100.3±3.0      | 93.3-103.0 |

784

785

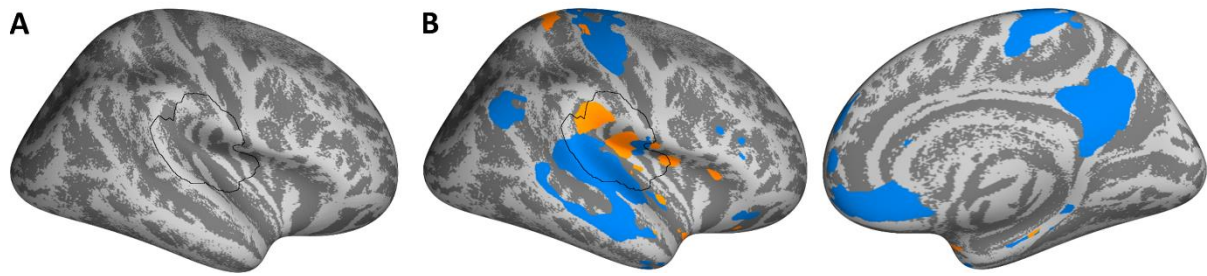

786

787 **S1 Figure.** Binary and signed masks used for analyses. **A.** Binary mask used for small volume correction used for  
788 all analyses (unless otherwise noted), delineated by the black line. **B.** Signed mask used for covering heat  
789 (orange) or sound (blue) contrasts.

790

791

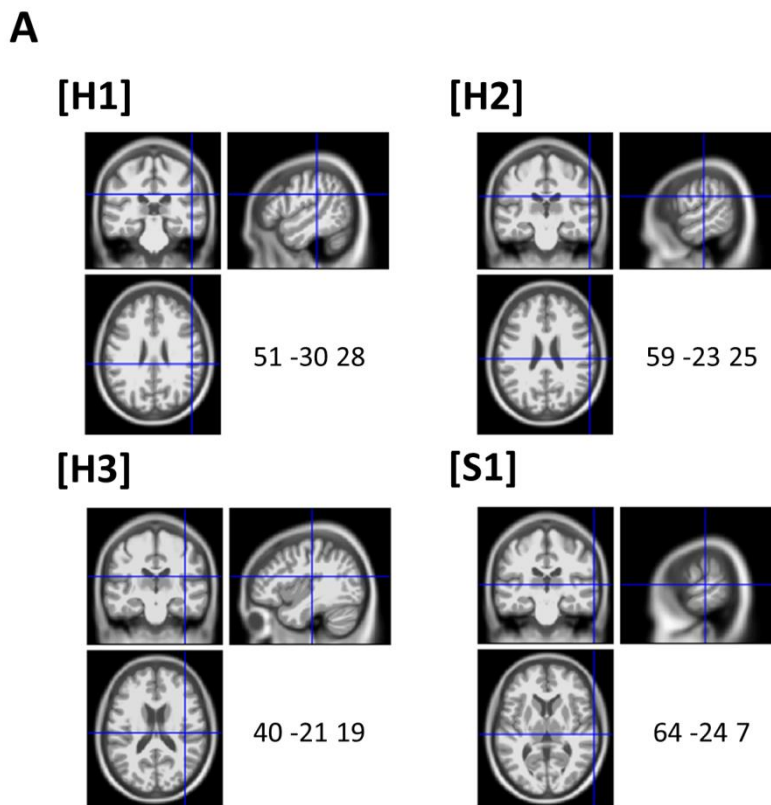

792

793 **S2 Figure.** Location of peak voxels for modality main effects (H1 through H3 for heat, S1 for sound). Also see  
794 Figure 4.

795

796

## Parietal operculum (SII)

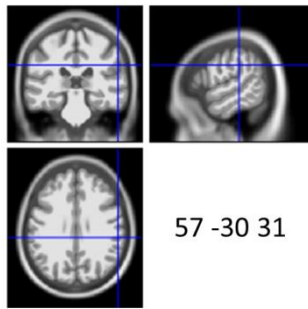

797

798 **S3 Figure.** Location of peak voxel for parametric modulation by heat intensity. Also see Figure 5.

799

**A**

**[H1]**

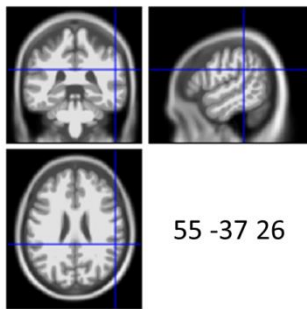

**[H2]**

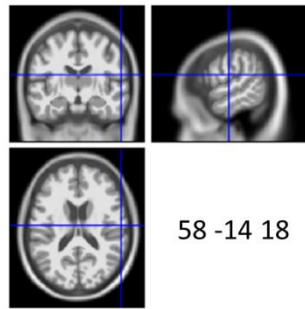

**[H3]**

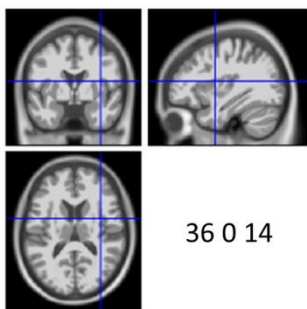

**[H4]**

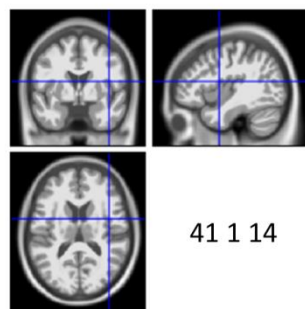

800

801 **S4 Figure.** Location of peak voxels for parametric modulation by ratings (H1 through H4). Also see Figure 6.

802

803

804

## Parietal operculum (SII)

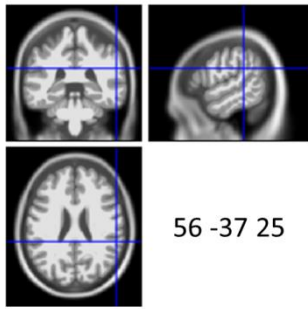

805

806 **S5 Figure.** Location of peak voxel for activation corresponding to the three axioms. Also see Figure 7.

807

808

809 **Supporting information – References**

- 810 SR 1. Beck AT, Steer RA, Brown GK. Manual for the Beck Depression Inventory-II. San Antonio, TX:  
811 Psychological Corporation Press; 1996.
- 812 SR 2. Hautzinger M, Keller F, Kühner C. BDI-II. Beck-Depressions-Inventar. Revision. 2nd ed.  
813 Frankfurt: Pearson Assessment; 2009.
- 814 SR 3. Kroenke K, Spitzer RL, Williams JBW. The PHQ-15: validity of a new measure for evaluating the  
815 severity of somatic symptoms. *Psychosom Med.* 2002;64(2):258–66.
- 816 SR 4. McNeil DW, Rainwater AJ. Development of the Fear of Pain Questionnaire-III. *J Behav Med.*  
817 1998;21(4):389–410.
- 818 SR 5. McCracken LM. “Attention” to pain in persons with chronic pain: A behavioral approach.  
819 *Behav Ther.* 1997;28(2):271–84. doi: 10.1016/S0005-7894(97)80047-0
- 820 SR 6. Ruscheweyh R, Marziniak M, Stumpfenhorst F, Reinholz J, Knecht S. Pain sensitivity can be  
821 assessed by self-rating: Development and validation of the Pain Sensitivity Questionnaire.  
822 *Pain.* 2009;146(1):65–74. doi: 10.1016/j.pain.2009.06.020
- 823 SR 7. Flor H, Behle DJ, Birbaumer N. Assessment of pain-related cognitions in chronic pain patients.  
824 *Behav Res Ther.* 1993;31(1):63–73.
- 825 SR 8. Spielberger CD, Gorsuch RL, Lushene RE. Manual for the State-Trait Anxiety Inventory. Palo  
826 Alto, CA: Consulting Psychologists Press; 1970.
- 827 SR 9. Laux L, Glanzmann P, Schaffner P, Spielberger CD. Das State-Trait-Angstinventar. Weinheim:  
828 Beltz; 1981.
- 829 SR 10. Steyer R, Schwenkmezger P, Notz P, Eid M. Der Mehrdimensionale Befindlichkeitsfragebogen  
830 (MDBF). Handanweisung. Göttingen: Hogrefe; 1997.

831
